# Supplementary material
Source: publisher figshare collection journal article supplement (https://geolsoc.figshare.com/ndownloader/files/5423531)
Supplement: Supplementary file 1 [file 5423531]

Sample: IS10-09
Locatilty: 57.67278N, 2.56114W
Irradiation can: #10
Irradiated:	1st March 2012
Analysed: 24th May, 2012
Mineral: Muscovite
Amount analysed: 2.2 mg
Grain size: 150-250
Temp	Ar36	Ar37	Ar38	Ar39	Ar40	Ar40*	Ar40*/Ar39(K)	Cumalative	Calculated age	Error	Ca/K	Cl/K
(C)	(mol)	(mol)	(mol)	(mol)	(mol)	(%)	(%)	Ar 39%	Ma	(1s.d)
450	4.31E-17	8.76E-17	1.02E-17	5.33E-16	1.97E-14	35.2	12.999	0.24	197.54	38.6	3.13E-01	-3.38E-01
500	6.02E-17	5.94E-17	3.62E-17	1.18E-15	4.58E-14	61.1	23.77	0.78	346.28	17.06	9.58E-02	2.98E-01
550	4.99E-17	1.04E-16	3.91E-17	1.88E-15	6.99E-14	78.9	29.365	1.63	418.97	13.47	1.05E-01	1.01E-01
600	2.93E-17	6.53E-16	5.72E-17	3.60E-15	1.29E-13	93.3	33.403	3.26	469.67	6.38	3.45E-01	4.66E-02
640	3.13E-17	3.69E-16	9.37E-17	6.06E-15	2.18E-13	95.7	34.5	6.01	483.2	2.53	1.16E-01	5.16E-02
680	2.27E-17	2.37E-16	1.36E-16	1.05E-14	3.71E-13	98.2	34.819	10.75	487.11	5.81	4.31E-02	-2.01E-02
720	1.08E-17	3.22E-16	1.96E-16	1.63E-14	5.65E-13	99.4	34.469	18.15	482.81	3.23	3.75E-02	-4.46E-02
750	3.01E-20	4.58E-16	2.68E-16	2.05E-14	7.03E-13	100	34.254	27.45	480.17	2.93	4.24E-02	-1.90E-03
780	5.63E-18	6.00E-16	3.49E-16	2.68E-14	9.17E-13	99.8	34.173	39.59	479.17	2.72	4.26E-02	-3.52E-03
810	1.74E-17	5.53E-16	4.03E-16	3.28E-14	1.10E-12	99.5	33.467	54.46	470.46	2.93	3.20E-02	-3.30E-02
840	1.04E-17	5.23E-16	3.69E-16	2.85E-14	9.71E-13	99.7	33.938	67.39	476.28	2.54	3.49E-02	-8.21E-03
860	2.76E-17	4.26E-16	1.99E-16	1.56E-14	5.31E-13	98.4	33.625	74.44	472.41	4.18	5.21E-02	-2.37E-02
890	2.54E-17	2.64E-16	1.52E-16	1.13E-14	3.87E-13	98	33.655	79.55	472.78	4.91	4.45E-02	-9.48E-04
920	1.18E-17	2.04E-16	1.19E-16	9.00E-15	3.10E-13	98.9	34.099	83.63	478.26	4.13	4.31E-02	-3.08E-03
960	1.27E-17	2.93E-16	1.37E-16	1.05E-14	3.52E-13	98.9	33.318	88.37	468.61	5.19	5.32E-02	-9.95E-03
1000	1.67E-18	4.15E-16	1.51E-16	1.18E-14	3.95E-13	99.9	33.459	93.71	470.36	2.93	6.69E-02	-1.17E-02
1040	2.03E-17	4.36E-16	1.54E-16	1.04E-14	3.52E-13	98.3	33.27	98.43	468.02	2.8	7.97E-02	5.08E-02
1090	1.74E-17	2.64E-16	5.28E-17	3.17E-15	1.10E-13	95.3	32.996	99.86	464.61	8.5	1.58E-01	9.51E-02
1150	9.53E-18	2.01E-16	1.55E-17	1.75E-16	9.12E-15	69.3	36.418	99.94	506.6	55.05	2.20E+00	2.41E+00
1250	1.19E-16	3.62E-17	2.27E-17	4.31E-17	3.90E-14	10	91.168	99.96	1072.01	1726.52	1.61E+00	-2.13E-01
1350	6.20E-16	6.02E-17	1.09E-16	4.28E-17	1.92E-13	4.6	209.405	99.98	1898.4	2870.64	2.70E+00	-7.15E+00
1450	1.63E-16	1.80E-17	3.68E-17	4.55E-17	4.63E-14	-3.7	0.001	100	0.016	9437.863	7.55E-01	4.61E+00
Total	1.31E-15	6.58E-15	3.11E-15	2.21E-13	7.83E-12
Lambda K40=	5.54E-10
J Factor =	8.90E-03
Total fusion age(1s.d.) =		474.32 � 6.59
Plateau age(1s.d.) =		475.69 � 5.46
